# Supplementary material for: SCD5 Expression Correlates with Prognosis and Response to Neoadjuvant Chemotherapy in Breast Cancer
Source: Research Square preprint supplement (doi:10.21203/rs.3.rs-117096/v1), 2020-12-10
Supplement: Supplementary file 2 [file 4e390f196ce8192629e171dc.docx]

Table S2 The correlation between SCD5 expression and cell cycle regulators

| Gene name | Pearson r | 95% confidence interval | P-value |
| --- | --- | --- | --- |
| CDK1 | -0.2541 | -0.3337 to -0.1709 | <0.0001 |
| CDK2 | -0.1245 | -0.2093 to -0.03796 | 0.0049 |
| CDK3 | -0.1400 | -0.2243 to -0.05367 | 0.0016 |
| CDK4 | -0.4126 | -0.4823 to -0.3377 | <0.0001 |
| CDK6 | -0.1206 | -0.2054 to -0.03392 | 0.0065 |
| CDK7 | -0.4983 | -0.5610 to -0.4300 | <0.0001 |
| CDK10 | -0.4217 | -0.4907 to -0.3475 | <0.0001 |
| CCND1 | -0.2369 | -0.3174 to -0.1531 | <0.0001 |
| CCND3 | -0.1510 | -0.2349 to -0.06487 | 0.0006 |
| CCNB1 | -0.3667 | -0.4396 to -0.2889 | <0.0001 |
