# Supplementary material for: SCD5 Expression Correlates with Prognosis and Response to Neoadjuvant Chemotherapy in Breast Cancer
Source: Research Square preprint supplement (doi:10.21203/rs.3.rs-117096/v1), 2020-12-10
Supplement: Supplementary file 3 [file 9e45da19fdd239816124c4fc.docx]

Title: SCD5 Expression Correlates with Prognosis and Response to Neoadjuvant Chemotherapy in Breast Cancer

Author list

Weipeng Zhao1§, Linlin Sun1§, Xichuan Li 2, Jun Wang 3, Ye Zhu 1, Yan Jia 1, Zhongsheng Tong 1*

Authorship note§: Weipeng Zhao and Linlin Sun contributed equally to this work.
