# Supplementary material for: SCD5 Expression Correlates with Prognosis and Response to Neoadjuvant Chemotherapy in Breast Cancer
Source: Research Square preprint supplement (doi:10.21203/rs.3.rs-117096/v1), 2020-12-10
Supplement: Supplementary file 4 [file 1ce9a938b97ed8237767a6b5.docx]

Table S1 The mRNA expression of SCD5 in human cancers

| Oncomine dataset | Cancer vs Normal | Total Number | p value | Fold change |
| --- | --- | --- | --- | --- |
| Sanchez-Carbayo Bladder | Superficial Bladder Cancer vs. Normal | 76(28 vs 48) | 3.50E-12 | -3.507 |
| TCGA Breast | Invasive Ductal Carcinoma vs. Normal | 450(389 vs 61) | 9.61E-8 | -1.791 |
| Skrzypczak Colorectal | Colon Adenoma vs. Normal | 15(5 vs 10) | 2.52E-5 | -2.765 |
| Jones Renal | Renal Oncocytoma vs. Normal | 35(12 vs 23) | 1.51E-6 | -1.815 |
| Selamat Lung | Lung Adenocarcinoma vs. Normal | 116(58 vs 58) | 1.20E-14 | -2.103 |
| Haqq Melanoma | Melanoma vs. Normal | 8(5 vs 3) | 0.034 | -2.151 |
| Lu Ovarian | Ovarian Serous Adenocarcinoma vs. Normal | 25(20 vs 5) | 0.003 | -3.453 |
| Iacobuzio-Donahue Pancreas | Pancreatic Adenocarcinoma vs. Normal | 17(12 vs 5) | 1.17E-5 | -3.730 |
| Tomlins Prostate | Prostatic Intraepithelial Neoplasia Epithelia vs. Normal | 36(13 vs 23) | 0.003 | -2.192 |
